# Supplementary material for: The Novel Anti-Cancer Agent, SpiD3, Is Cytotoxic in CLL Cells Resistant to Ibrutinib or Venetoclax
Source: PubMed Central journal article supplement (PMC11500768; doi:10.3390/hemato5030024), 2024-08-27
Supplement: NIHMS2026135-supplement-Supplementary_Material.pdf [file NIHMS2026135-supplement-Supplementary_Material.pdf]

## Supplemental Tables and Figures

**Supplemental Table S1: Molecular characteristics of the CLL cell lines.**

| CLL cell line        | Key characteristics ( <i>IGHV</i> mutational status & karyotype) |
|----------------------|------------------------------------------------------------------|
| HG-3 <sup>1</sup>    | Mutated <i>IGHV</i> ; Non-complex karyotype; t12, t19            |
| OSU-CLL <sup>2</sup> | Unmutated <i>IGHV</i> ; Non-complex karyotype; del 13q           |

*IGHV*: immunoglobulin heavy-chain variable region gene.

<sup>1</sup> The HG-3 cell line originated from a CLL patient with un-mutated *IGHV* and demonstrates non-complex karyotype with biallelic 13q14 deletions. [1]

<sup>2</sup> The OSU-CLL cell line originated from a CLL patient with mutated *IGHV* and non-complex karyotype that is defined as having less than three chromosomal aberrations. [2]

**Supplemental Table S2: Primary antibodies for immunoblotting.**

| Primary Antibodies               | Catalog number |
|----------------------------------|----------------|
| <b>Cell Signaling Technology</b> |                |
| BFL1                             | 14093          |
| p-BTK (Tyr223)                   | 87457          |
| BTK                              | 8547           |
| p-ERK1/2 (Thr202/Tyr204)         | 4377           |
| ERK1/2                           | 4695           |
| GAPDH                            | 5174           |
| GPX4                             | 52455          |
| HMOX1                            | 43966          |
| KEAP1                            | 8047           |
| MCL1                             | 5453           |
| c-MYC                            | 5605           |
| NCOA4                            | 66849          |
| PARP                             | 9542           |
| p-PRAS (Thr246)                  | 13175          |
| PRAS                             | 2691           |
| SLC3A2                           | 47213          |
| <b>Santa Cruz Biotechnology</b>  |                |
| p65                              | sc-8008        |

Supplemental Figure S1: Ibrutinib modifies transcriptional profiles in wild-type and ibrutinib-resistant CLL cells.

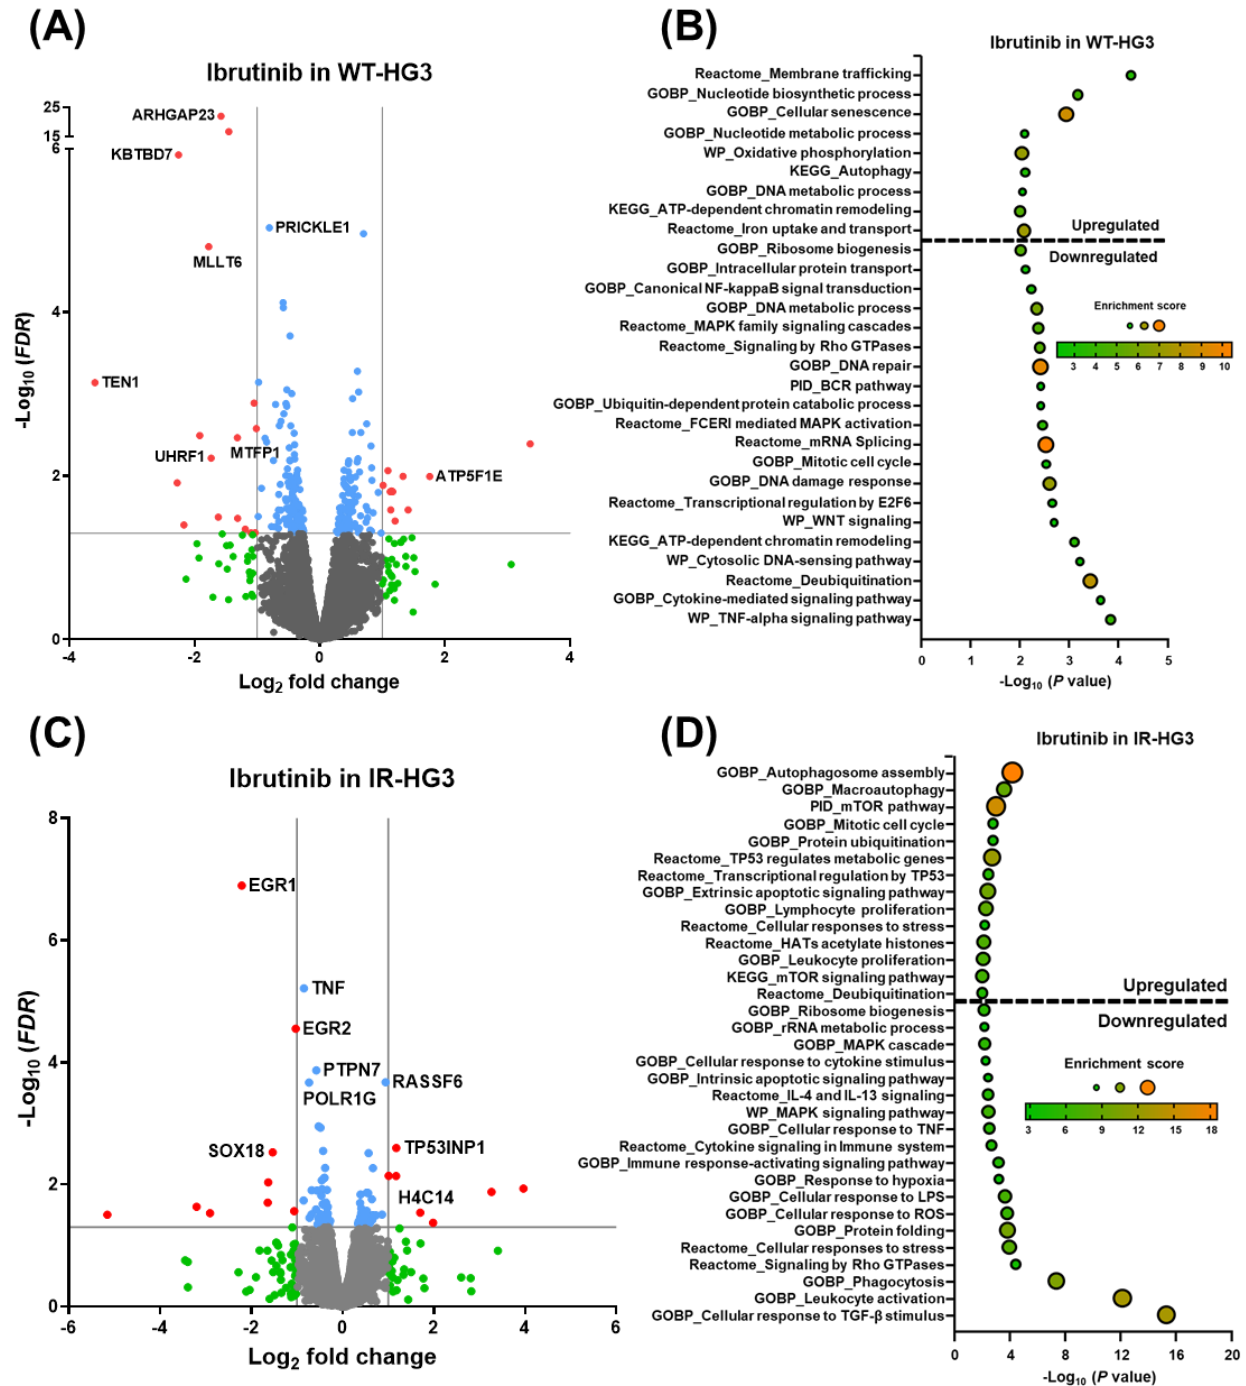

Supplemental Figure S1: Ibrutinib modifies transcriptional profiles in wild-type and ibrutinib-resistant CLL cells. (A-D): RNA-sequencing of parental wild-type (WT) HG-3 and ibrutinib-resistant (IR) HG-3 cells treated with ibrutinib (1  $\mu$ M) or equivalent DMSO vehicle (VEH;  $n = 3$  independent experiments). (A) Volcano plot of ibrutinib-treated WT-HG3 cells compared to VEH-treated WT-HG3 cells with select CLL-relevant genes labeled. Genes meeting both the statistical significance ( $FDR < 0.05$ ) and fold-change ( $|\text{Log}_2 \text{FC}| > 1$ ) parameters (red) were used for downstream analysis. Genes meeting only statistical significance

(blue), only fold-change (green), or neither threshold (grey) are shown for comparison. **(B)** Gene set enrichment analysis (GSEA) of the statistically significant differentially expressed genes (DEGs) in ibrutinib-treated WT-HG3 cells compared to VEH-treated WT-HG3 cells. **(C)** Volcano plot of ibrutinib-treated IR-HG3 cells compared to VEH-treated IR-HG3 cells with select CLL-relevant genes labeled. Genes meeting both the statistical significance ( $FDR < 0.05$ ) and fold-change ( $|\text{Log}_2 \text{FC}| > 1$ ) parameters (red) were used for downstream analysis (red). Genes meeting only statistical significance (blue), only fold-change (green), or neither threshold (grey) are shown for comparison. **(D)** GSEA of the statistically significant DEGs in ibrutinib-treated IR-HG3 cells compared to VEH-treated IR-HG3 cells.

**Supplemental Figure S2: SpiD3 decreases viability while modulating ferroptosis in ibrutinib-resistant CLL cells.**

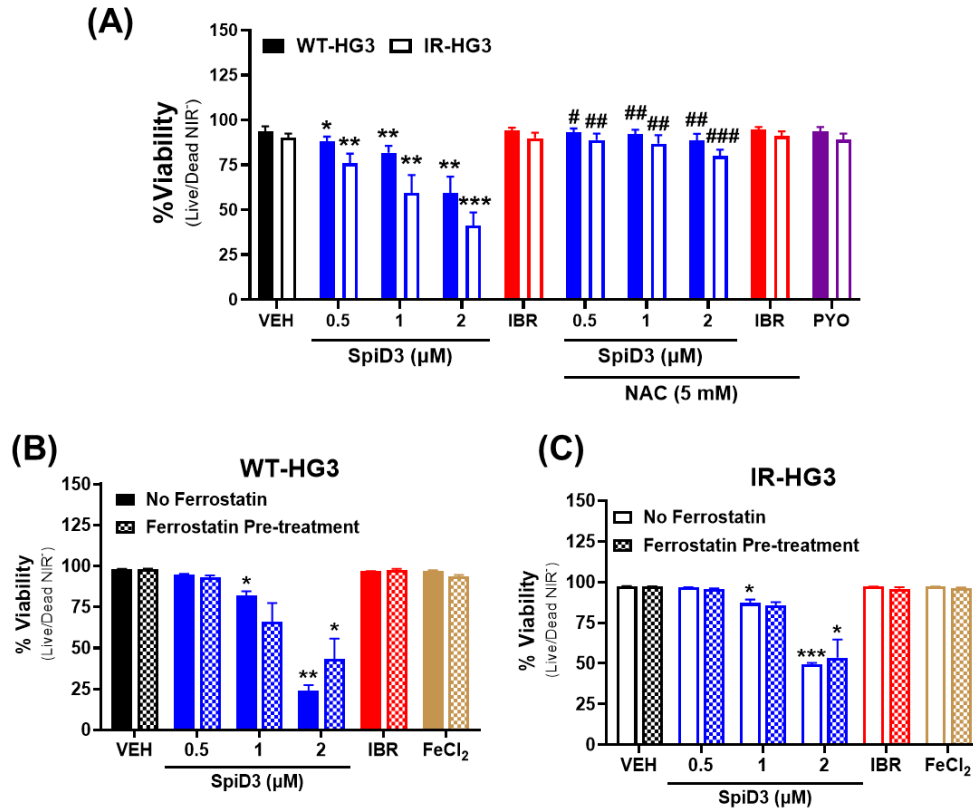

**Supplemental Figure S2: SpiD3 decreases viability while modulating ferroptosis in ibrutinib-resistant CLL cells.** (A) Wild-type (WT) and ibrutinib (IR) HG-3 cells were pre-treated with 5 mM N-acetylcysteine (NAC, 1 h) followed by SpiD3 (0.5, 1, 2 μM), ibrutinib (IBR; 1 μM), or equivalent DMSO vehicle (VEH) for 24 h. Pyocyanin (PYO, 1 mM) served as a control ROS inducer ( $n = 3$  independent experiments/cell line). Percent viability per condition is shown. Data are represented as mean  $\pm$  SEM. Asterisks denote significance vs. corresponding VEH: \*  $p < 0.05$ , \*\*  $p < 0.01$ , \*\*\*  $p < 0.001$ . Hashtags denote significance between non-NAC pre-treated samples and NAC pre-treated samples: #  $p < 0.05$ , ##  $p < 0.01$ , ###  $p < 0.001$ . (B,C): WT-HG3 (B) and IR-HG3 (C) cells were pre-treated with ferrostatin (10 μM) for 1 h followed by SpiD3 (0.5, 1, 2 μM), IBR (1 μM), or VEH for 48 h. FeCl<sub>2</sub> (160 μM) served as a control ferroptosis inducer. Percent viability per condition is shown. Data are represented as mean  $\pm$  SEM. Asterisks denote significance vs. corresponding VEH: \*  $p < 0.05$ , \*\*  $p < 0.01$ , \*\*\*  $p < 0.001$ .

Supplemental Figure S3: Venetoclax modifies transcriptional profiles in wild-type and venetoclax-resistant cells.

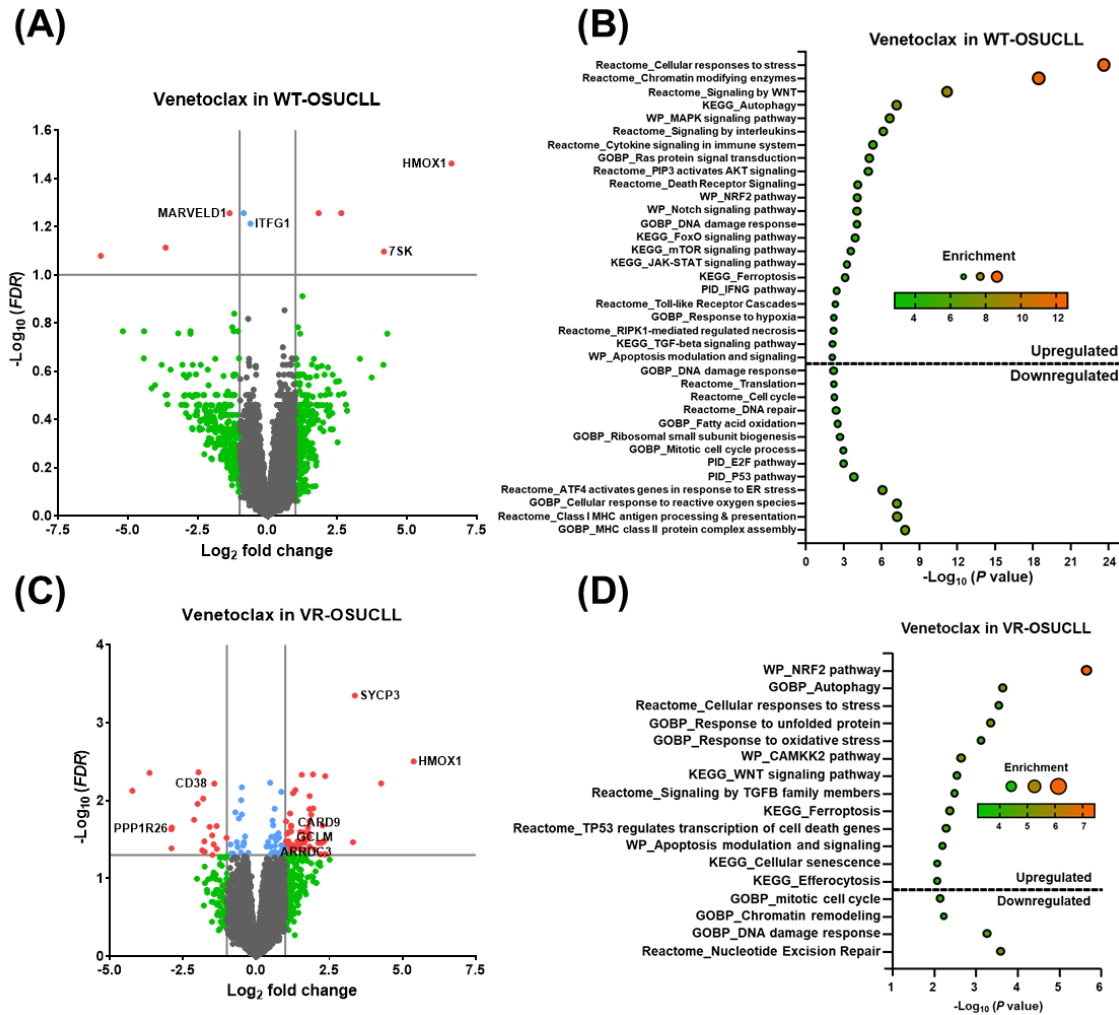

**Supplemental Figure S3: Venetoclax modifies transcriptional profiles in wild-type and venetoclax-resistant cells.** (A-D): RNA-sequencing of parental wild-type (WT) OSU-CLL and venetoclax-resistant (VR) OSU-CLL cells treated with venetoclax (1  $\mu$ M) or equivalent DMSO vehicle (VEH;  $n = 3$  independent experiments). (A,B): The transcriptional profiles from vehicle-treated WT-OSUCLL samples from the previous study (GSE236239) [3] were analyzed and incorporated into the volcano and gene set enrichment analysis (GSEA). (A) Volcano plot of venetoclax-treated WT-OSUCLL cells compared to VEH-treated WT-OSUCLL cells with select CLL-relevant genes labeled. Genes meeting both the statistical significance ( $FDR < 0.05$ ) and fold-change ( $|\log_2 FC| > 1$ ) parameters (red) were used for downstream analysis. Genes meeting only statistical significance (blue), only fold-change (green), or neither threshold (grey) are shown for comparison. (B) GSEA of the statistically significant differentially expressed genes (DEGs) in venetoclax-treated WT-OSUCLL cells compared to VEH-treated WT-OSUCLL cells. (C) Volcano plot of venetoclax-treated VR-OSUCLL cells compared to VEH-treated VR-OSUCLL cells with select CLL-relevant genes labeled. Genes meeting both the statistical significance ( $FDR < 0.05$ ) and fold-change ( $|\log_2 FC| > 1$ ) parameters (red) were used for downstream analysis. Genes meeting only statistical significance (blue), only fold-change (green), or neither threshold (grey) are shown for comparison. (D) GSEA of the statistically significant DEGs in venetoclax-treated VR-OSUCLL cells compared to VEH-treated VR-OSUCLL cells.

**Supplemental Figure S4: SpiD3 decreases viability while modulating ferroptosis in venetoclax-resistant CLL cells.**

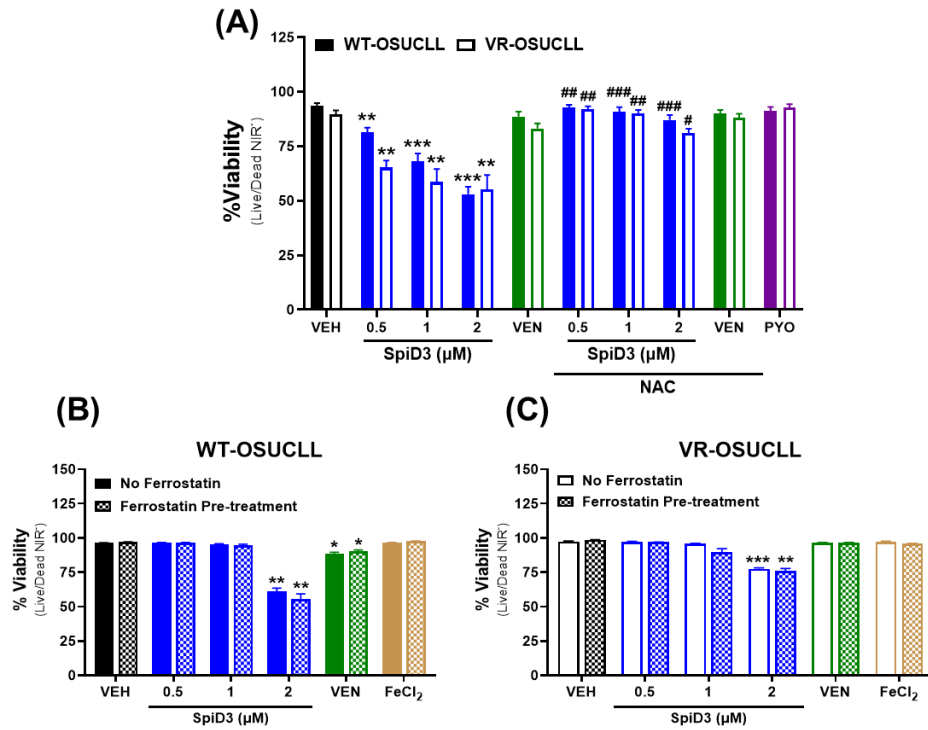

**Supplemental Figure S4: SpiD3 decreases viability while modulating ferroptosis in venetoclax-resistant CLL cells.** (A) Wild-type (WT) and venetoclax-resistant (VR) OSU-CLL cells were pre-treated with 5 mM N-acetylcysteine (NAC, 1 h) followed by SpiD3 (0.5, 1, 2 μM), venetoclax (VEN; 1 μM), or equivalent DMSO vehicle (VEH) for 24 h. Pyocyanin (PYO, 1 mM) served as a control ROS inducer ( $n = 3$  independent experiments/cell line). Percent viability per condition is shown. Data are represented as mean  $\pm$  SEM. Asterisks denote significance vs. corresponding VEH: \*\*  $p < 0.01$ , \*\*\*  $p < 0.001$ . Hashtags denote significance between non-NAC pre-treated samples and NAC pre-treated samples: #  $p < 0.05$ , ##  $p < 0.01$ , ###  $p < 0.001$ . (B,C): WT-OSUCLL (B) and VR-OSUCLL (C) cells were pre-treated with ferrostatin (10 μM) for 1 h followed by SpiD3 (0.5, 1, 2 μM), VEN (1 μM), or VEH for 48 h. FeCl<sub>2</sub> (160 μM) served as a control ferroptosis inducer. Percent viability per condition is shown. Data are represented as mean  $\pm$  SEM. Asterisks denote significance vs. corresponding VEH: \*  $p < 0.05$ , \*\*  $p < 0.01$ , \*\*\*  $p < 0.001$ .

**Supplemental Figure S5: Protein quantification of SLC3A2.**

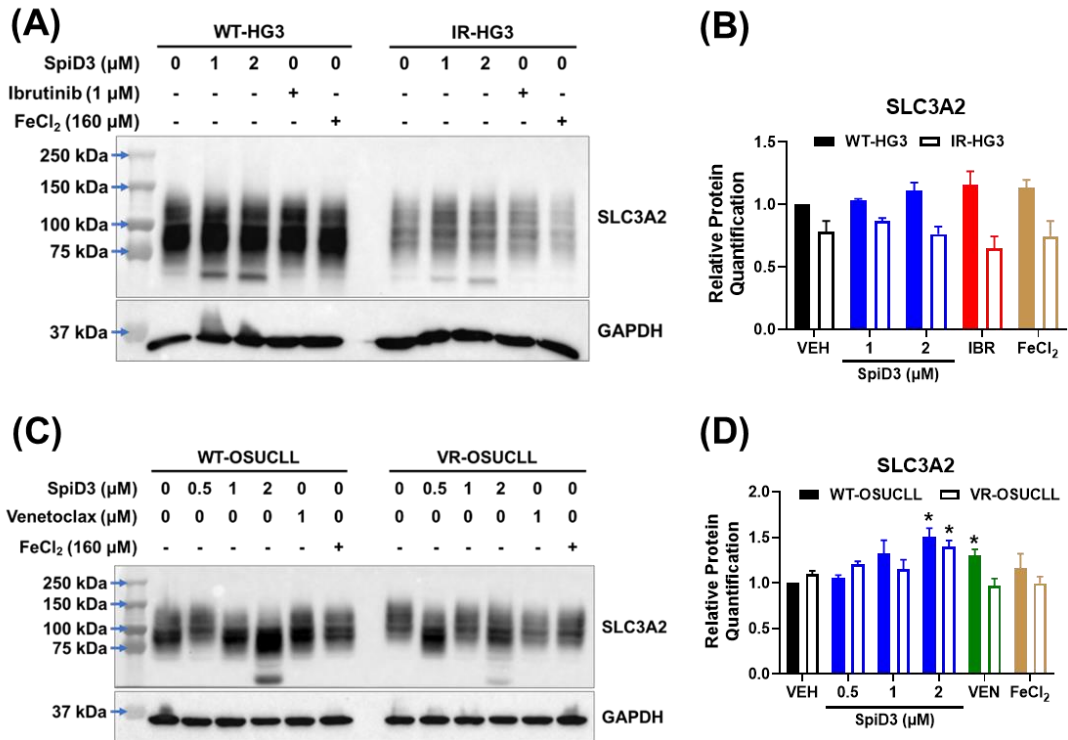

**Supplemental Figure S5: Protein quantification of SLC3A2.** (A) Representative immunoblot analysis of SLC3A2 in WT-HG3 and IR-HG3 cells treated with SpiD3 (1, 2  $\mu\text{M}$ ), ibrutinib (1  $\mu\text{M}$ ), or FeCl<sub>2</sub> (160  $\mu\text{M}$ ) for 4 h ( $n = 3$  independent experiments). GAPDH served as the loading control. (B) Protein quantification of the immunoblot analysis of SLC3A2. Data are represented as mean  $\pm$  SEM. (C) Representative immunoblot analysis of SLC3A2 in WT-OSUCLL and VR-OSUCLL cells treated with SpiD3 (0.5, 1, 2  $\mu\text{M}$ ), VEN (1  $\mu\text{M}$ ), or FeCl<sub>2</sub> (160  $\mu\text{M}$ ) for 24 h ( $n = 3$  independent experiments/cell line). GAPDH served as the loading control. (D) Protein quantification of the immunoblot analysis of SLC3A2. Data are represented as mean  $\pm$  SEM. Asterisks denote significance vs. corresponding VEH: \*  $p < 0.05$ .

## References

1. Rosen, A.; Bergh, A.C.; Gogok, P.; Evaldsson, C.; Myhrinder, A.L.; Hellqvist, E.; Rasul, A.; Bjorkholm, M.; Jansson, M.; Mansouri, L.; et al. Lymphoblastoid cell line with B1 cell characteristics established from a chronic lymphocytic leukemia clone by in vitro EBV infection. *Oncoimmunology* **2012**, *1*, 18-27, doi:10.4161/onci.1.1.18400.
2. Hertlein, E.; Beckwith, K.A.; Lozanski, G.; Chen, T.L.; Towns, W.H.; Johnson, A.J.; Lehman, A.; Ruppert, A.S.; Bolon, B.; Andritsos, L.; et al. Characterization of a new chronic lymphocytic leukemia cell line for mechanistic in vitro and in vivo studies relevant to disease. *PLoS One* **2013**, *8*, e76607, doi:10.1371/journal.pone.0076607.
3. Eiken, A.P.; Smith, A.L.; Skupa, S.A.; Schmitz, E.; Rana, S.; Singh, S.; Kumar, S.; Mallareddy, J.R.; de Cubas, A.A.; Krishna, A.; et al. Novel spirocyclic dimer, SpiD3, targets chronic lymphocytic leukemia survival pathways with potent preclinical effects. *Cancer Res Commun* **2024**, *4*, 1328-1343, doi:10.1158/2767-9764.CRC-24-0071.
